# Supplementary material
Source: publisher site journal article supplement (https://www.dovepress.com/article/295844)
Supplement: Supplementary file 1 [file get_supplementary_file.php]

A validated register-based algorithm to identify patients diagnosed with recurrence of malignant melanoma in Denmark, Rasmussen et al., Clin Epidemiol.

SUPPLEMENTARY MATERIAL.

---

**Table 1:** Concordance of recurrence of malignant melanoma identified by the gold standard and the algorithm

|                         |       | Recurrence by gold standard |       |       |
|-------------------------|-------|-----------------------------|-------|-------|
|                         |       | Yes                         | No    | Total |
| Recurrence by algorithm | Yes   | 72                          | 12    | 84    |
|                         | No    | 3                           | 1,533 | 1,536 |
|                         | Total | 75                          | 1,545 | 1,620 |

**Table 2:** Performance of the algorithm to identify recurrence from malignant melanoma (n=1,620)

| Algorithm performance     | % (95% CI)        |
|---------------------------|-------------------|
| Sensitivity               | 96.0 (88.8-99.2)  |
| Specificity               | 99.2 (98.6-99.6)  |
| Positive predictive value | 85.7 (76.4-92.4)  |
| Negative predictive value | 99.8 (99.4-100.0) |

**Table 3:** Accuracy of cancer recurrence date as estimated from the algorithm compared with the gold standard (n=1,620)

| Algorithm estimated date | % (95% CI) |
|--------------------------|------------|
| Same date                | 22 (14-34) |
| Within 7 days            | 43 (33-55) |
| Within 30 days           | 75 (65-84) |
| Within 60 days           | 83 (74-91) |
| Within 90 days           | 86 (77-92) |

---
